# Supplementary material for: The SARS-CoV-2 Spike Protein D614G Mutation Shows Increasing Dominance and May Confer a Structural Advantage to the Furin Cleavage Domain
Source: Preprints.org preprint supplement (doi:10.20944/preprints202005.0407.v1), 2020-05-24
Supplement: Supplementary file 1 [file supplementary]

## Sheet: S1 Mutation frequencies
Position in S	Mutation	Position in S	Mutation	Count	Frequency	Comment
-	No Mutation			4096	0.354878	Wuhan S
5	L->F	476	G->S	3	0.00025992	L5F and G476S
5	L->F	1232	I->V	3	0.00025992	L5F and I1232V
5	L->F			52	0.00450529
8	L->V	138	D->Y	3	0.00025992	L8V and D138Y
8	L->V			25	0.002166
9	P->S			3	0.00025992
12	S->F			3	0.00025992
18	L->F			7	0.000606481
21	R->I			8	0.000693121
22	T->I			3	0.00025992
27	A->S			4	0.00034656
27	A->V			4	0.00034656
29	T->I	704	S->L	5	0.0004332	T29I and S704L
29	T->I			8	0.000693121
49	H->Y			32	0.00277248
50	S->L			21	0.00181944
54	L->F			13	0.00112632
71	S->F			4	0.00034656
76	T->I			3	0.00025992
80	D->Y			5	0.0004332
90	V->F			3	0.00025992
95	T->I			3	0.00025992
98	S->F			8	0.000693121
120	V->I			3	0.00025992
128	I->F			3	0.00025992
138	D->H			5	0.0004332
141	LGVY->			3	0.00025992	L141, G142, V143, Y144 are deleted
142	G->A			3	0.00025992
143	VY->D			4	0.00034656	V143D and Y144 is deleted
144	Y->			6	0.000519841	Y144 is deleted
145	Y->H			8	0.000693121
146	H->Y			8	0.000693121
176	L->F			6	0.000519841
177	M->I			5	0.0004332
181	G->V			4	0.00034656
197	I->V			5	0.0004332
214	R->L			3	0.00025992
215	D->Y			3	0.00025992
221	S->L			4	0.00034656
239	Q->K			10	0.000866401
243	A->S			3	0.00025992
247	S->R			3	0.00025992
254	S->F			9	0.000779761
255	S->F			5	0.0004332
258	W->L			3	0.00025992
261	G->V			5	0.0004332
262	A->T			4	0.00034656
288	A->S			3	0.00025992
309	E->Q			3	0.00025992
338	F->L			3	0.00025992
367	V->F			16	0.00138624
414	Q->E			6	0.000519841
439	N->K			6	0.000519841
476	G->S			7	0.000606481
483	V->A			27	0.00233928
520	A->S			6	0.000519841
521	->SC			3	0.00025992	SC is inserted between P521 and A522
522	A->V			3	0.00025992
522	A->S			4	0.00034656
547	T->I			3	0.00025992
561	P->L			3	0.00025992
570	A->V			3	0.00025992
583	E->D			3	0.00025992
594	G->S			3	0.00025992
611	L->F			4	0.00034656
614	->RT			20	0.0017328	RT is inserted between D614 and V615
614	D->G			6477	0.561168
615	V->I			8	0.000693121
622	V->I			4	0.00034656
623	A->V			3	0.00025992
626	A->V			10	0.000866401
655	H->Y			9	0.000779761
675	Q->H			21	0.00181944
677	Q->H			4	0.00034656
704	S->L			4	0.00034656
706	A->V			9	0.000779761
731	M->I			3	0.00025992
765	R->H			4	0.00034656
765	R->L			9	0.000779761
791	T->I			6	0.000519841
809	P->S			3	0.00025992
812	P->S			7	0.000606481
829	A->T			11	0.000953041
831	A->V			29	0.00251256
839	D->Y			25	0.002166
845	A->S			7	0.000606481
846	A->V	936	D->Y	3	0.00025992	A846V and D936Y
846	A->V			5	0.0004332
852	A->V			3	0.00025992
879	A->S			12	0.00103968
892	A->S	1207	E->D	3	0.00025992	A892S and E1207D
929	S->I			3	0.00025992
936	D->Y			43	0.00372552
939	S->F			12	0.00103968
940	S->F			5	0.0004332
943	S->P			20	0.0017328
1078	A->S			16	0.00138624
1084	D->Y			3	0.00025992
1091	R->L			4	0.00034656
1124	->KT			17	0.00147288	KT is inserted after G1124
1124	G->V			43	0.00372552
1147	S->L			4	0.00034656
1162	P->L			5	0.0004332
1165	D->G			3	0.00025992
1176	V->F			6	0.000519841
1203	L->F			4	0.00034656
1219	G->V			3	0.00025992
1229	M->I			9	0.000779761
1237	M->I			8	0.000693121
1247	C->F			4	0.00034656
1252	S->F			3	0.00025992
1254	C->F			3	0.00025992
1259	D->H			3	0.00025992
1260	D->N			5	0.0004332
1263	P->L			77	0.00667129
Total				11542

## Sheet: S2 Spike genotypes by countries
Country	Total	D	G	D %	G %	Other %
Algeria	3	0	3	0	1	0
Argentina	29	0	26	0	0.896552	0.103448
Australia	1294	441	600	0.340804	0.463679	0.195518
Austria	21	4	15	0.190476	0.714286	0.0952381
bat	1	0	0	0	0	1
Belarus	2	1	1	0.5	0.5	0
Belgium	390	44	278	0.112821	0.712821	0.174359
Brazil	68	9	49	0.132353	0.720588	0.147059
Cambodia	1	1	0	1	0	0
Canada	145	69	62	0.475862	0.427586	0.0965517
canine	1	0	0	0	0	1
Chile	7	6	1	0.857143	0.142857	0
China	486	352	13	0.72428	0.026749	0.248971
Colombia	2	1	1	0.5	0.5	0
Croatia	7	1	6	0.142857	0.857143	0
CzechRepublic	28	0	25	0	0.892857	0.107143
Denmark	334	23	295	0.0688623	0.883234	0.0479042
DRC	45	2	38	0.0444444	0.844444	0.111111
Ecuador	4	0	1	0	0.25	0.75
Egypt	2	0	2	0	1	0
England	2022	786	974	0.388724	0.481701	0.129575
Estonia	4	0	3	0	0.75	0.25
Finland	40	7	19	0.175	0.475	0.35
France	227	9	186	0.0396476	0.819383	0.140969
Gambia	3	1	2	0.333333	0.666667	0
Georgia	13	5	6	0.384615	0.461538	0.153846
Germany	86	19	58	0.22093	0.674419	0.104651
Ghana	13	5	6	0.384615	0.461538	0.153846
Greece	5	0	4	0	0.8	0.2
Hungary	3	0	3	0	1	0
Iceland	590	141	370	0.238983	0.627119	0.133898
India	47	16	21	0.340426	0.446809	0.212766
Iran	1	1	0	1	0	0
Ireland	13	4	9	0.307692	0.692308	0
Israel	2	1	1	0.5	0.5	0
Italy	52	3	45	0.0576923	0.865385	0.0769231
Japan	102	77	18	0.754902	0.176471	0.0686275
Jordan	21	6	13	0.285714	0.619048	0.0952381
Kuwait	8	4	2	0.5	0.25	0.25
Latvia	10	2	7	0.2	0.7	0.1
Lithuania	1	0	1	0	1	0
Luxembourg	204	13	172	0.0637255	0.843137	0.0931373
Malaysia	15	12	0	0.8	0	0.2
Mexico	16	3	6	0.1875	0.375	0.4375
Nepal	1	1	0	1	0	0
Netherlands	583	205	316	0.35163	0.542024	0.106346
NewZealand	8	6	2	0.75	0.25	0
Nigeria	1	0	1	0	1	0
NorthernIreland	1	0	1	0	1	0
Norway	29	10	15	0.344828	0.517241	0.137931
Pakistan	2	2	0	1	0	0
Panama	1	0	1	0	1	0
pangolin	5	0	0	0	0	1
Peru	1	0	1	0	1	0
Philippines	7	6	0	0.857143	0	0.142857
Poland	15	2	7	0.133333	0.466667	0.4
Portugal	100	11	77	0.11	0.77	0.12
Qatar	15	11	0	0.733333	0	0.266667
Russia	151	4	143	0.0264901	0.94702	0.0264901
SaudiArabia	3	1	2	0.333333	0.666667	0
Scotland	392	142	203	0.362245	0.517857	0.119898
Senegal	19	3	14	0.157895	0.736842	0.105263
Singapore	74	62	6	0.837838	0.0810811	0.0810811
Slovakia	4	1	3	0.25	0.75	0
Slovenia	4	2	0	0.5	0	0.5
SouthAfrica	7	3	4	0.428571	0.571429	0
SouthKorea	36	35	0	0.972222	0	0.0277778
Spain	194	81	99	0.417526	0.510309	0.0721649
SriLanka	4	2	2	0.5	0.5	0
Sweden	67	5	49	0.0746269	0.731343	0.19403
Switzerland	76	0	72	0	0.947368	0.0526316
Taiwan	68	22	29	0.323529	0.426471	0.25
Thailand	31	3	15	0.0967742	0.483871	0.419355
tiger	1	0	1	0	1	0
Turkey	30	7	20	0.233333	0.666667	0.1
Uruguay	10	10	0	1	0	0
USA	3104	1067	1772	0.34375	0.570876	0.0853737
Vietnam	8	5	3	0.625	0.375	0
Wales	665	318	277	0.478195	0.416541	0.105263
	12085	4096	6477	0.338933	0.535954	0.125114

## Sheet: S2 Spike genotypes by US states
	Total	D	G	D %	G %	Other %
AK	10	2	7	0.2	0.7	0.1
AZ	82	9	56	0.109756	0.682927	0.207317
CA	137	77	45	0.562044	0.328467	0.109489
Cruise	25	23	0	0.92	0	0.08
CT	130	25	98	0.192308	0.753846	0.0538462
DC	1	1	0	1	0	0
FL	10	4	5	0.4	0.5	0.1
GA	15	10	3	0.666667	0.2	0.133333
HI	2	1	1	0.5	0.5	0
IA	7	0	6	0	0.857143	0.142857
ID	41	1	35	0.0243902	0.853659	0.121951
IL	15	9	5	0.6	0.333333	0.0666667
IN	6	0	3	0	0.5	0.5
KS	1	0	1	0	1	0
LA	3	0	3	0	1	0
MA	19	2	17	0.105263	0.894737	0
MD	2	0	1	0	0.5	0.5
MI	9	2	7	0.222222	0.777778	0
MN	77	20	49	0.25974	0.636364	0.103896
MO	1	0	1	0	1	0
NC	8	2	6	0.25	0.75	0
NE	7	3	2	0.428571	0.285714	0.285714
NH	4	0	4	0	1	0
NJ	13	1	11	0.0769231	0.846154	0.0769231
NV	2	1	0	0.5	0	0.5
NY	747	46	641	0.0615797	0.858099	0.0803213
OH	8	1	7	0.125	0.875	0
OR	11	4	5	0.363636	0.454545	0.181818
PA	9	0	9	0	1	0
RI	4	0	4	0	1	0
SC	7	6	1	0.857143	0.142857	0
TX	5	2	2	0.4	0.4	0.2
UT	93	14	57	0.150538	0.612903	0.236559
VA	80	17	57	0.2125	0.7125	0.075
WA	1219	666	455	0.546349	0.373257	0.0803938
WI	280	113	154	0.403571	0.55	0.0464286
WY	14	5	9	0.357143	0.642857	0

## Sheet: S3 Australia
Date	Day #	D	G
2020-01-01	1	0	0
2020-01-02	2	0	0
2020-01-03	3	0	0
2020-01-04	4	0	0
2020-01-05	5	0	0
2020-01-06	6	0	0
2020-01-07	7	0	0
2020-01-08	8	0	0
2020-01-09	9	0	0
2020-01-10	10	0	0
2020-01-11	11	0	0
2020-01-12	12	0	0
2020-01-13	13	0	0
2020-01-14	14	0	0
2020-01-15	15	0	0
2020-01-16	16	0	0
2020-01-17	17	0	0
2020-01-18	18	0	0
2020-01-19	19	0	0
2020-01-20	20	0	0
2020-01-21	21	0	0
2020-01-22	22	1	0
2020-01-23	23	1	0
2020-01-24	24	4	0
2020-01-25	25	7	0
2020-01-26	26	7	0
2020-01-27	27	7	0
2020-01-28	28	8	0
2020-01-29	29	8	0
2020-01-30	30	9	0
2020-01-31	31	10	0
2020-02-01	32	10	0
2020-02-02	33	11	0
2020-02-03	34	11	0
2020-02-04	35	11	0
2020-02-05	36	13	0
2020-02-06	37	13	0
2020-02-07	38	13	0
2020-02-08	39	14	0
2020-02-09	40	14	0
2020-02-10	41	14	0
2020-02-11	42	14	0
2020-02-12	43	14	0
2020-02-13	44	14	0
2020-02-14	45	14	0
2020-02-15	46	14	0
2020-02-16	47	14	0
2020-02-17	48	14	0
2020-02-18	49	14	0
2020-02-19	50	14	0
2020-02-20	51	14	0
2020-02-21	52	16	0
2020-02-22	53	17	1
2020-02-23	54	18	1
2020-02-24	55	19	1
2020-02-25	56	19	1
2020-02-26	57	19	1
2020-02-27	58	19	1
2020-02-28	59	25	1
2020-02-29	60	28	1
2020-03-01	61	28	1
2020-03-02	62	31	1
2020-03-03	63	34	1
2020-03-04	64	39	2
2020-03-05	65	43	2
2020-03-06	66	47	4
2020-03-07	67	49	4
2020-03-08	68	55	6
2020-03-09	69	59	8
2020-03-10	70	78	11
2020-03-11	71	89	20
2020-03-12	72	96	26
2020-03-13	73	106	31
2020-03-14	74	119	36
2020-03-15	75	128	41
2020-03-16	76	143	51
2020-03-17	77	163	69
2020-03-18	78	187	89
2020-03-19	79	209	110
2020-03-20	80	241	139
2020-03-21	81	274	175
2020-03-22	82	305	225
2020-03-23	83	340	284
2020-03-24	84	360	326
2020-03-25	85	392	372
2020-03-26	86	405	409
2020-03-27	87	425	450
2020-03-28	88	438	484
2020-03-29	89	447	514
2020-03-30	90	460	547
2020-03-31	91	472	570
2020-04-01	92	479	600
2020-04-02	93	484	609
2020-04-03	94	490	629
2020-04-04	95	496	647
2020-04-05	96	500	660
2020-04-06	97	512	672
2020-04-07	98	518	686
2020-04-08	99	523	704
2020-04-09	100	527	716
2020-04-10	101	532	724
2020-04-11	102	536	732
2020-04-12	103	538	735
2020-04-13	104	541	739
2020-04-14	105	543	741
2020-04-15	106	543	741
2020-04-16	107	543	741
2020-04-17	108	543	742
2020-04-18	109	543	742
2020-04-19	110	543	742
2020-04-20	111	543	742
2020-04-21	112	543	742
2020-04-22	113	543	742
2020-04-23	114	543	742
2020-04-24	115	543	742
2020-04-25	116	543	742
2020-04-26	117	543	742
2020-04-27	118	543	742
2020-04-28	119	543	742
2020-04-29	120	543	742
2020-04-30	121	543	742

## Sheet: S3 Belgium
Date	Day #	D	G
2020-01-01	1	0	0
2020-01-02	2	0	0
2020-01-03	3	0	0
2020-01-04	4	0	0
2020-01-05	5	0	0
2020-01-06	6	0	0
2020-01-07	7	0	0
2020-01-08	8	0	0
2020-01-09	9	0	0
2020-01-10	10	0	0
2020-01-11	11	0	0
2020-01-12	12	0	0
2020-01-13	13	0	0
2020-01-14	14	0	0
2020-01-15	15	0	0
2020-01-16	16	0	0
2020-01-17	17	0	0
2020-01-18	18	0	0
2020-01-19	19	0	0
2020-01-20	20	0	0
2020-01-21	21	0	0
2020-01-22	22	0	0
2020-01-23	23	0	0
2020-01-24	24	0	0
2020-01-25	25	0	0
2020-01-26	26	0	0
2020-01-27	27	0	0
2020-01-28	28	0	0
2020-01-29	29	0	0
2020-01-30	30	0	0
2020-01-31	31	0	0
2020-02-01	32	0	0
2020-02-02	33	0	0
2020-02-03	34	1	0
2020-02-04	35	1	0
2020-02-05	36	1	0
2020-02-06	37	1	0
2020-02-07	38	1	0
2020-02-08	39	1	0
2020-02-09	40	1	0
2020-02-10	41	1	0
2020-02-11	42	1	0
2020-02-12	43	1	0
2020-02-13	44	1	0
2020-02-14	45	1	0
2020-02-15	46	1	0
2020-02-16	47	1	0
2020-02-17	48	1	0
2020-02-18	49	1	0
2020-02-19	50	1	0
2020-02-20	51	1	0
2020-02-21	52	1	0
2020-02-22	53	1	0
2020-02-23	54	1	0
2020-02-24	55	1	0
2020-02-25	56	1	0
2020-02-26	57	1	0
2020-02-27	58	1	0
2020-02-28	59	1	0
2020-02-29	60	1	1
2020-03-01	61	2	6
2020-03-02	62	2	15
2020-03-03	63	2	20
2020-03-04	64	2	34
2020-03-05	65	3	60
2020-03-06	66	5	84
2020-03-07	67	8	91
2020-03-08	68	8	92
2020-03-09	69	10	100
2020-03-10	70	11	101
2020-03-11	71	11	101
2020-03-12	72	11	101
2020-03-13	73	11	104
2020-03-14	74	14	108
2020-03-15	75	15	114
2020-03-16	76	15	117
2020-03-17	77	16	121
2020-03-18	78	16	125
2020-03-19	79	17	141
2020-03-20	80	17	145
2020-03-21	81	17	147
2020-03-22	82	17	166
2020-03-23	83	19	175
2020-03-24	84	29	210
2020-03-25	85	38	232
2020-03-26	86	39	232
2020-03-27	87	39	232
2020-03-28	88	39	232
2020-03-29	89	39	232
2020-03-30	90	40	252
2020-03-31	91	42	270
2020-04-01	92	42	270
2020-04-02	93	42	270
2020-04-03	94	43	281
2020-04-04	95	45	288
2020-04-05	96	47	301
2020-04-06	97	47	312
2020-04-07	98	49	333
2020-04-08	99	49	341
2020-04-09	100	49	341
2020-04-10	101	49	341
2020-04-11	102	49	341
2020-04-12	103	49	341
2020-04-13	104	49	341
2020-04-14	105	49	341
2020-04-15	106	49	341
2020-04-16	107	49	341
2020-04-17	108	49	341
2020-04-18	109	49	341
2020-04-19	110	49	341
2020-04-20	111	49	341
2020-04-21	112	49	341
2020-04-22	113	49	341
2020-04-23	114	49	341
2020-04-24	115	49	341
2020-04-25	116	49	341
2020-04-26	117	49	341
2020-04-27	118	49	341
2020-04-28	119	49	341
2020-04-29	120	49	341
2020-04-30	121	49	341

## Sheet: S3 Canada
Date	Day #	D	G
2020-01-01	1	0	0
2020-01-02	2	0	0
2020-01-03	3	0	0
2020-01-04	4	0	0
2020-01-05	5	0	0
2020-01-06	6	0	0
2020-01-07	7	0	0
2020-01-08	8	0	0
2020-01-09	9	0	0
2020-01-10	10	0	0
2020-01-11	11	0	0
2020-01-12	12	0	0
2020-01-13	13	0	0
2020-01-14	14	0	0
2020-01-15	15	0	0
2020-01-16	16	0	0
2020-01-17	17	0	0
2020-01-18	18	0	0
2020-01-19	19	0	0
2020-01-20	20	0	0
2020-01-21	21	0	0
2020-01-22	22	0	0
2020-01-23	23	2	0
2020-01-24	24	2	0
2020-01-25	25	4	0
2020-01-26	26	4	0
2020-01-27	27	4	0
2020-01-28	28	4	0
2020-01-29	29	4	0
2020-01-30	30	4	0
2020-01-31	31	4	0
2020-02-01	32	4	0
2020-02-02	33	4	0
2020-02-03	34	4	0
2020-02-04	35	4	0
2020-02-05	36	4	0
2020-02-06	37	4	0
2020-02-07	38	4	0
2020-02-08	39	4	0
2020-02-09	40	4	0
2020-02-10	41	4	0
2020-02-11	42	4	0
2020-02-12	43	4	0
2020-02-13	44	4	0
2020-02-14	45	4	0
2020-02-15	46	4	0
2020-02-16	47	5	0
2020-02-17	48	5	0
2020-02-18	49	5	0
2020-02-19	50	5	0
2020-02-20	51	7	0
2020-02-21	52	7	0
2020-02-22	53	7	0
2020-02-23	54	7	0
2020-02-24	55	7	0
2020-02-25	56	7	0
2020-02-26	57	7	0
2020-02-27	58	8	0
2020-02-28	59	9	0
2020-02-29	60	9	1
2020-03-01	61	10	1
2020-03-02	62	12	1
2020-03-03	63	14	1
2020-03-04	64	19	1
2020-03-05	65	25	2
2020-03-06	66	26	2
2020-03-07	67	28	5
2020-03-08	68	30	7
2020-03-09	69	36	10
2020-03-10	70	44	16
2020-03-11	71	54	28
2020-03-12	72	66	42
2020-03-13	73	71	52
2020-03-14	74	73	57
2020-03-15	75	75	60
2020-03-16	76	75	62
2020-03-17	77	75	62
2020-03-18	78	76	63
2020-03-19	79	76	63
2020-03-20	80	77	64
2020-03-21	81	77	64
2020-03-22	82	77	64
2020-03-23	83	77	64
2020-03-24	84	77	64
2020-03-25	85	77	64
2020-03-26	86	77	64
2020-03-27	87	77	64
2020-03-28	88	77	64
2020-03-29	89	77	64
2020-03-30	90	77	64
2020-03-31	91	77	64
2020-04-01	92	77	64
2020-04-02	93	77	64
2020-04-03	94	77	64
2020-04-04	95	77	64
2020-04-05	96	77	64
2020-04-06	97	77	64
2020-04-07	98	77	64
2020-04-08	99	77	64
2020-04-09	100	77	64
2020-04-10	101	77	64
2020-04-11	102	77	64
2020-04-12	103	77	64
2020-04-13	104	77	64
2020-04-14	105	77	64
2020-04-15	106	77	64
2020-04-16	107	77	64
2020-04-17	108	77	64
2020-04-18	109	77	64
2020-04-19	110	77	64
2020-04-20	111	77	64
2020-04-21	112	77	64
2020-04-22	113	77	64
2020-04-23	114	77	64
2020-04-24	115	77	64
2020-04-25	116	77	64
2020-04-26	117	77	64
2020-04-27	118	77	64
2020-04-28	119	77	64
2020-04-29	120	77	64
2020-04-30	121	77	64

## Sheet: S3 China
Date	Day #	D	G
2020-01-01	1	6	0
2020-01-02	2	8	0
2020-01-03	3	8	0
2020-01-04	4	8	0
2020-01-05	5	9	0
2020-01-06	6	9	0
2020-01-07	7	9	0
2020-01-08	8	11	0
2020-01-09	9	11	0
2020-01-10	10	12	0
2020-01-11	11	15	0
2020-01-12	12	15	0
2020-01-13	13	17	0
2020-01-14	14	18	0
2020-01-15	15	22	0
2020-01-16	16	25	0
2020-01-17	17	29	0
2020-01-18	18	36	0
2020-01-19	19	39	0
2020-01-20	20	44	0
2020-01-21	21	66	0
2020-01-22	22	84	0
2020-01-23	23	99	0
2020-01-24	24	110	1
2020-01-25	25	127	1
2020-01-26	26	136	1
2020-01-27	27	147	1
2020-01-28	28	163	2
2020-01-29	29	182	3
2020-01-30	30	210	3
2020-01-31	31	216	3
2020-02-01	32	244	3
2020-02-02	33	263	3
2020-02-03	34	267	3
2020-02-04	35	278	3
2020-02-05	36	297	5
2020-02-06	37	303	6
2020-02-07	38	317	7
2020-02-08	39	331	9
2020-02-09	40	346	9
2020-02-10	41	359	9
2020-02-11	42	363	9
2020-02-12	43	366	9
2020-02-13	44	370	9
2020-02-14	45	371	9
2020-02-15	46	374	9
2020-02-16	47	374	9
2020-02-17	48	378	9
2020-02-18	49	378	9
2020-02-19	50	381	9
2020-02-20	51	381	9
2020-02-21	52	381	9
2020-02-22	53	385	9
2020-02-23	54	388	9
2020-02-24	55	391	9
2020-02-25	56	401	9
2020-02-26	57	405	9
2020-02-27	58	406	9
2020-02-28	59	423	10
2020-02-29	60	423	10
2020-03-01	61	423	10
2020-03-02	62	423	10
2020-03-03	63	423	10
2020-03-04	64	424	10
2020-03-05	65	424	10
2020-03-06	66	425	10
2020-03-07	67	425	10
2020-03-08	68	425	10
2020-03-09	69	425	10
2020-03-10	70	426	10
2020-03-11	71	426	10
2020-03-12	72	426	10
2020-03-13	73	426	10
2020-03-14	74	427	15
2020-03-15	75	428	15
2020-03-16	76	428	15
2020-03-17	77	428	15
2020-03-18	78	428	15
2020-03-19	79	428	15
2020-03-20	80	428	15
2020-03-21	81	428	15
2020-03-22	82	428	15
2020-03-23	83	429	15
2020-03-24	84	429	15
2020-03-25	85	429	15
2020-03-26	86	429	15
2020-03-27	87	429	15
2020-03-28	88	429	15
2020-03-29	89	429	15
2020-03-30	90	429	15
2020-03-31	91	429	15
2020-04-01	92	429	15
2020-04-02	93	429	15
2020-04-03	94	429	15
2020-04-04	95	429	15
2020-04-05	96	429	15
2020-04-06	97	429	15
2020-04-07	98	429	15
2020-04-08	99	429	15
2020-04-09	100	429	15
2020-04-10	101	429	15
2020-04-11	102	429	15
2020-04-12	103	429	15
2020-04-13	104	429	15
2020-04-14	105	429	15
2020-04-15	106	429	15
2020-04-16	107	429	15
2020-04-17	108	429	15
2020-04-18	109	429	15
2020-04-19	110	429	15
2020-04-20	111	429	15
2020-04-21	112	429	15
2020-04-22	113	429	15
2020-04-23	114	429	15
2020-04-24	115	429	15
2020-04-25	116	429	15
2020-04-26	117	429	15
2020-04-27	118	429	15
2020-04-28	119	429	15
2020-04-29	120	429	15
2020-04-30	121	429	15

## Sheet: S3 Denmark
Date	Day #	D	G
2020-01-01	1	0	0
2020-01-02	2	0	0
2020-01-03	3	0	0
2020-01-04	4	0	0
2020-01-05	5	0	0
2020-01-06	6	0	0
2020-01-07	7	0	0
2020-01-08	8	0	0
2020-01-09	9	0	0
2020-01-10	10	0	0
2020-01-11	11	0	0
2020-01-12	12	0	0
2020-01-13	13	0	0
2020-01-14	14	0	0
2020-01-15	15	0	0
2020-01-16	16	0	0
2020-01-17	17	0	0
2020-01-18	18	0	0
2020-01-19	19	0	0
2020-01-20	20	0	0
2020-01-21	21	0	0
2020-01-22	22	0	0
2020-01-23	23	0	0
2020-01-24	24	0	0
2020-01-25	25	0	0
2020-01-26	26	0	0
2020-01-27	27	0	0
2020-01-28	28	0	0
2020-01-29	29	0	0
2020-01-30	30	0	0
2020-01-31	31	0	0
2020-02-01	32	0	0
2020-02-02	33	0	0
2020-02-03	34	0	0
2020-02-04	35	0	0
2020-02-05	36	0	0
2020-02-06	37	0	0
2020-02-07	38	0	0
2020-02-08	39	0	0
2020-02-09	40	0	0
2020-02-10	41	0	0
2020-02-11	42	0	0
2020-02-12	43	0	0
2020-02-13	44	0	0
2020-02-14	45	0	0
2020-02-15	46	0	0
2020-02-16	47	0	0
2020-02-17	48	0	0
2020-02-18	49	0	0
2020-02-19	50	0	0
2020-02-20	51	0	0
2020-02-21	52	0	0
2020-02-22	53	0	0
2020-02-23	54	0	0
2020-02-24	55	0	0
2020-02-25	56	0	0
2020-02-26	57	0	1
2020-02-27	58	0	1
2020-02-28	59	0	2
2020-02-29	60	0	2
2020-03-01	61	0	3
2020-03-02	62	1	7
2020-03-03	63	1	14
2020-03-04	64	1	15
2020-03-05	65	1	15
2020-03-06	66	1	16
2020-03-07	67	1	18
2020-03-08	68	1	35
2020-03-09	69	7	78
2020-03-10	70	17	147
2020-03-11	71	18	163
2020-03-12	72	18	166
2020-03-13	73	19	169
2020-03-14	74	19	172
2020-03-15	75	20	179
2020-03-16	76	20	190
2020-03-17	77	20	197
2020-03-18	78	20	204
2020-03-19	79	20	204
2020-03-20	80	20	204
2020-03-21	81	20	205
2020-03-22	82	20	211
2020-03-23	83	21	245
2020-03-24	84	21	265
2020-03-25	85	22	297
2020-03-26	86	23	309
2020-03-27	87	23	309
2020-03-28	88	23	311
2020-03-29	89	23	311
2020-03-30	90	23	311
2020-03-31	91	23	311
2020-04-01	92	23	311
2020-04-02	93	23	311
2020-04-03	94	23	311
2020-04-04	95	23	311
2020-04-05	96	23	311
2020-04-06	97	23	311
2020-04-07	98	23	311
2020-04-08	99	23	311
2020-04-09	100	23	311
2020-04-10	101	23	311
2020-04-11	102	23	311
2020-04-12	103	23	311
2020-04-13	104	23	311
2020-04-14	105	23	311
2020-04-15	106	23	311
2020-04-16	107	23	311
2020-04-17	108	23	311
2020-04-18	109	23	311
2020-04-19	110	23	311
2020-04-20	111	23	311
2020-04-21	112	23	311
2020-04-22	113	23	311
2020-04-23	114	23	311
2020-04-24	115	23	311
2020-04-25	116	23	311
2020-04-26	117	23	311
2020-04-27	118	23	311
2020-04-28	119	23	311
2020-04-29	120	23	311
2020-04-30	121	23	311

## Sheet: S3 England
Date	Day #	D	G
2020-01-01	1	0	0
2020-01-02	2	0	0
2020-01-03	3	0	0
2020-01-04	4	0	0
2020-01-05	5	0	0
2020-01-06	6	0	0
2020-01-07	7	0	0
2020-01-08	8	0	0
2020-01-09	9	0	0
2020-01-10	10	0	0
2020-01-11	11	0	0
2020-01-12	12	0	0
2020-01-13	13	0	0
2020-01-14	14	0	0
2020-01-15	15	0	0
2020-01-16	16	0	0
2020-01-17	17	0	0
2020-01-18	18	0	0
2020-01-19	19	0	0
2020-01-20	20	0	0
2020-01-21	21	0	0
2020-01-22	22	0	0
2020-01-23	23	0	0
2020-01-24	24	0	0
2020-01-25	25	0	0
2020-01-26	26	0	0
2020-01-27	27	0	0
2020-01-28	28	0	0
2020-01-29	29	2	0
2020-01-30	30	2	0
2020-01-31	31	2	0
2020-02-01	32	2	0
2020-02-02	33	2	0
2020-02-03	34	2	0
2020-02-04	35	2	0
2020-02-05	36	3	0
2020-02-06	37	3	0
2020-02-07	38	4	0
2020-02-08	39	7	0
2020-02-09	40	8	0
2020-02-10	41	8	0
2020-02-11	42	8	0
2020-02-12	43	8	0
2020-02-13	44	8	0
2020-02-14	45	8	0
2020-02-15	46	8	0
2020-02-16	47	8	0
2020-02-17	48	8	0
2020-02-18	49	8	0
2020-02-19	50	8	0
2020-02-20	51	8	0
2020-02-21	52	8	0
2020-02-22	53	8	0
2020-02-23	54	9	1
2020-02-24	55	9	1
2020-02-25	56	13	1
2020-02-26	57	14	2
2020-02-27	58	16	4
2020-02-28	59	20	5
2020-02-29	60	20	12
2020-03-01	61	26	20
2020-03-02	62	30	33
2020-03-03	63	37	52
2020-03-04	64	42	56
2020-03-05	65	51	61
2020-03-06	66	61	73
2020-03-07	67	67	77
2020-03-08	68	73	85
2020-03-09	69	75	94
2020-03-10	70	80	96
2020-03-11	71	95	106
2020-03-12	72	113	121
2020-03-13	73	126	133
2020-03-14	74	138	134
2020-03-15	75	147	136
2020-03-16	76	172	147
2020-03-17	77	214	175
2020-03-18	78	291	230
2020-03-19	79	335	274
2020-03-20	80	387	342
2020-03-21	81	434	386
2020-03-22	82	474	430
2020-03-23	83	554	532
2020-03-24	84	636	625
2020-03-25	85	688	702
2020-03-26	86	711	754
2020-03-27	87	744	828
2020-03-28	88	781	896
2020-03-29	89	807	972
2020-03-30	90	834	1043
2020-03-31	91	855	1117
2020-04-01	92	864	1135
2020-04-02	93	867	1140
2020-04-03	94	867	1142
2020-04-04	95	867	1142
2020-04-05	96	867	1142
2020-04-06	97	867	1142
2020-04-07	98	867	1142
2020-04-08	99	867	1142
2020-04-09	100	867	1142
2020-04-10	101	867	1142
2020-04-11	102	867	1142
2020-04-12	103	867	1142
2020-04-13	104	867	1142
2020-04-14	105	867	1142
2020-04-15	106	867	1142
2020-04-16	107	867	1142
2020-04-17	108	867	1142
2020-04-18	109	867	1142
2020-04-19	110	867	1142
2020-04-20	111	867	1142
2020-04-21	112	867	1142
2020-04-22	113	867	1142
2020-04-23	114	867	1142
2020-04-24	115	867	1142
2020-04-25	116	867	1142
2020-04-26	117	867	1142
2020-04-27	118	867	1142
2020-04-28	119	867	1142
2020-04-29	120	867	1142
2020-04-30	121	867	1142

## Sheet: S3 France
Date	Day #	D	G
2020-01-01	1	0	0
2020-01-02	2	0	0
2020-01-03	3	0	0
2020-01-04	4	0	0
2020-01-05	5	0	0
2020-01-06	6	0	0
2020-01-07	7	0	0
2020-01-08	8	0	0
2020-01-09	9	0	0
2020-01-10	10	0	0
2020-01-11	11	0	0
2020-01-12	12	0	0
2020-01-13	13	0	0
2020-01-14	14	0	0
2020-01-15	15	0	0
2020-01-16	16	0	0
2020-01-17	17	0	0
2020-01-18	18	0	0
2020-01-19	19	0	0
2020-01-20	20	0	0
2020-01-21	21	0	0
2020-01-22	22	0	0
2020-01-23	23	3	0
2020-01-24	24	3	0
2020-01-25	25	3	0
2020-01-26	26	3	0
2020-01-27	27	3	0
2020-01-28	28	5	0
2020-01-29	29	8	0
2020-01-30	30	8	0
2020-01-31	31	8	0
2020-02-01	32	8	0
2020-02-02	33	9	0
2020-02-03	34	9	0
2020-02-04	35	9	0
2020-02-05	36	9	0
2020-02-06	37	9	0
2020-02-07	38	9	0
2020-02-08	39	10	0
2020-02-09	40	10	0
2020-02-10	41	10	0
2020-02-11	42	10	0
2020-02-12	43	10	0
2020-02-13	44	10	0
2020-02-14	45	10	0
2020-02-15	46	10	0
2020-02-16	47	10	0
2020-02-17	48	10	0
2020-02-18	49	10	0
2020-02-19	50	10	0
2020-02-20	51	10	0
2020-02-21	52	10	2
2020-02-22	53	10	2
2020-02-23	54	10	2
2020-02-24	55	10	2
2020-02-25	56	11	2
2020-02-26	57	12	6
2020-02-27	58	12	6
2020-02-28	59	12	7
2020-02-29	60	12	8
2020-03-01	61	13	8
2020-03-02	62	13	14
2020-03-03	63	13	18
2020-03-04	64	13	34
2020-03-05	65	14	39
2020-03-06	66	15	47
2020-03-07	67	15	54
2020-03-08	68	15	60
2020-03-09	69	15	62
2020-03-10	70	15	67
2020-03-11	71	15	74
2020-03-12	72	15	82
2020-03-13	73	15	83
2020-03-14	74	15	85
2020-03-15	75	15	93
2020-03-16	76	15	103
2020-03-17	77	15	120
2020-03-18	78	16	126
2020-03-19	79	16	130
2020-03-20	80	16	137
2020-03-21	81	16	146
2020-03-22	82	16	164
2020-03-23	83	16	194
2020-03-24	84	16	203
2020-03-25	85	16	207
2020-03-26	86	16	209
2020-03-27	87	16	209
2020-03-28	88	16	209
2020-03-29	89	16	209
2020-03-30	90	16	210
2020-03-31	91	16	210
2020-04-01	92	16	210
2020-04-02	93	16	210
2020-04-03	94	16	210
2020-04-04	95	16	210
2020-04-05	96	16	210
2020-04-06	97	16	210
2020-04-07	98	16	210
2020-04-08	99	16	210
2020-04-09	100	16	210
2020-04-10	101	16	210
2020-04-11	102	16	210
2020-04-12	103	16	210
2020-04-13	104	16	210
2020-04-14	105	16	210
2020-04-15	106	16	210
2020-04-16	107	16	210
2020-04-17	108	16	210
2020-04-18	109	16	210
2020-04-19	110	16	210
2020-04-20	111	16	210
2020-04-21	112	16	210
2020-04-22	113	16	210
2020-04-23	114	16	210
2020-04-24	115	16	210
2020-04-25	116	16	210
2020-04-26	117	16	210
2020-04-27	118	16	210
2020-04-28	119	16	210
2020-04-29	120	16	210
2020-04-30	121	16	210

[truncated: 22 more sheets: S3 Iceland, S3 Japan, S3 Luxembourg, S3 Netherlands, S3 Russia, S3 Scotland, S3 Spain, S3 USA, S3 Wales, S4 US Summary, S4 Arizona, S4 California, S4 Connecticut, S4 Minnesota, S4 New York, S4 Utah, S4 Virginia, S4 Washington, S4 Wisconsin, S5 GISAID Dataset …]
